# Supplementary material for: A new phylogenetic data standard for computable clade definitions: the Phyloreference Exchange Format (Phyx)
Source: PeerJ. 2022 Feb 15;10:e12618. doi: 10.7717/peerj.12618 (PMC8855714; doi:10.7717/peerj.12618)
Supplement: Supplemental Information 3 [file peerj-10-12618-s003.xlsx]

## Sheet: Sheet1
Entity	Field name	Description	Type	Example	RDF property
Phyx	@context	Required. The JSON-LD context, necessary to interpret this JSON file as an RDF file.	IRI	Depends on the version of the Phyx standard being used. Currently, this should be http://www.phyloref.org/phyx.js/context/v0.2.0/phyx.json	N/A
Phyx	@type	Additional RDF types for the top level object. (“owl:Ontology” will be added automatically.)	Array of either IRIs or CURIEs	[ “https://schema.org/DigitalDocument” ]	rdf:type
Phyx	owl:imports	A list of OWL ontologies to be imported during reasoning. (See Ontology metadata for the list of ontologies that will be automatically added to this field.)	Array of IRIs	[ “http://purl.obolibrary.org/obo/pato.owl” ]	owl:imports
Phyx	doi	The Digital Object Identifier (doi) for this Phyx file.	DOI	10.5281/zenodo.4562685	http://prismstandard.org/namespaces/basic/2.0/doi
Phyx	source	A citation to this Phyx file.	Citation	See example of Citation below.	dct:source
Phyx	defaultNomenclaturalCodeIRI*	The default nomenclatural code to be used in this file, for both phylogenies and phyloreferences. This will only be used for nodes and taxon concept specifiers that don’t have a nomenclatural code set.	IRI	http://rs.tdwg.org/ontology/voc/TaxonName#ICZN	N/A
Phyx	phylogenies	A list of phylogenies in this Phyx file.	Array of Phylogenies	See example of Phylogeny below.	"@reverse": "rdfs:isDefinedBy"
Phyx	phylorefs	A list of phyloreferences in this Phyx file.	Array of Phyloreferences	See example of Phyloreference below.	"@reverse": "rdfs:isDefinedBy"
Citation	bibliographicCitation	A bibliographic reference for the resource. If not included, one will be generated from the other fields in this citation.	String	Kirsten M. Fisher, Dennis P. Wall, Kwok Leung Yip, Brent D. Mishler (1 March 2007) Phylogeny of the Calymperaceae with a rank-free systematic treatment. The Bryologist, 110(1):46-73, doi: 10.1639/0007-2745(2007)110[46:POTCWA]2.0.CO;2	dct:bibliographicCitation
Citation	type	The type of this citation. Should be one of the BibTeX entry types (https://www.bibtex.com/e/entry-types/), such as “article”, “book”, “inbook” and so on.	String	article	N/A
Citation	title	The title of this publication.	String	Integrating molecular phylogenetic and paleobotanical evidence on origin of the flower.	N/A
Citation	year	The year of publication.	Integer	2008	N/A
Citation	authors	A list of authors of this publication. Each author is described with the following fields:	Array of Objects		N/A
Citation	- name	The full name of the author.	String	J. A. Doyle	N/A
Citation	- alternate	A list of alternate representations of the author name.	Array of Strings	[ “Doyle, J. A.” ]	N/A
Citation	- firstname	The first (or given) name of the author.	String	J.	N/A
Citation	- middlename	The middle name of the author.	String	A.	N/A
Citation	- lastname	The last (or family) name of the author.	String	Doyle	N/A
Citation	editors	A list of editors, in the same format as the authors.	Array of Objects	See author example above.	N/A
Citation	series_editors	A list of series editors, in the same format as the authors.	Array of Objects	See author example above.	N/A
Citation	identifier	A list of identifiers, each of which has the following properties:	Array of Objects		N/A
Citation	- type	Required. The type of identifier.	String	doi, issn	N/A
Citation	- id	Required. The identifier itself.	String	10.1086/589887, 0002-9327	N/A
Citation	link	A list of links with the following properties:	Array of Objects		N/A
Citation	- url	Required. A URL to this article	URL	https://www.journals.uchicago.edu/doi/10.1086/589887	N/A
Citation	journal	An object containing information on the journal this publication belongs to. A journal can have the following properties:	Object		N/A
Citation	- name	Required. The journal name.	String	International Journal of Plant Science	N/A
Citation	- volume	The journal volume.	String	169	N/A
Citation	- number	The issue number.	String	7	N/A
Citation	- pages	The page numbers of the journal that this citation refers to.	String	816--843	N/A
Citation	- identifier	A list of identifiers (for the journal), in the same format as the “identifier” properties above.	Array of Objects	[ { "id": "0002-9327", "type": "issn" } ]	N/A
Citation	booktitle	The title of the book that this publication is part of.	String	Phylonyms	N/A
Citation	publisher	The publisher of this publication.	String	The University of Chicago Press	N/A
Citation	city	The city in which this publication was published.	String	Chicago, IL	N/A
Citation	pages	The page numbers of this publication that this citation should refer to.	String	816--843	N/A
Citation	figure	The figures this citation refers to.	String	3C, 3A, 4	N/A
Taxonomic Unit identified solely by IRI	@id	Required. An opaque identifier for this taxonomic unit.	IRI	https://avibase.bsc-eoc.org/species.jsp?avibaseid=C600B65C997827CD (referring to a particular circumscription of a taxon concept labeled the “Canada or Cackling Goose”)	N/A
Taxon or taxon concept	@type	Required. We use the TDWG Taxon Concept ontology (http://rs.tdwg.org/ontology/voc/TaxonConcept) for types and properties.	IRI	Must be http://rs.tdwg.org/ontology/voc/TaxonConcept#TaxonConcept	rdf:type
Taxon or taxon concept	hasName	Required. The taxonomic name of this taxon or taxon concept. It is described with the following fields:	Object		tc:hasName
Taxon or taxon concept	- @type	Required. We use the TDWG Taxon Name ontology (http://rs.tdwg.org/ontology/voc/TaxonName) for types and properties.	IRI	Must be http://rs.tdwg.org/ontology/voc/TaxonName#TaxonName	rdf:type
Taxon or taxon concept	- nomenclaturalCode	The nomenclatural code under which this taxon name was created.	IRI	http://rs.tdwg.org/ontology/voc/TaxonName#ICZN	tn:nomenclaturalCode
Taxon or taxon concept	- nameComplete	Required. The complete uninomial, binomial or trinomial name without any authority or year components.	String	Alligator mississippiensis	tn:nameComplete
Taxon or taxon concept	- genusPart	The genus portion of the taxon name.	String	Alligator	tn:genusPart
Taxon or taxon concept	- specificEpithet	The specific epithet portion of the taxon name.	String	mississippiensis	tn:specificEpithet
Taxon or taxon concept	- label	The full taxon name, including an authority or year components.	String	Alligator mississippiensis (Daudin, 1802)	rdfs:label
Taxon or taxon concept	nameAccordingTo	Publication or authors whose circumscription of the taxon is intended to be used. If omitted, the nominal taxon concept (in the sense of Kennedy et al, (2006)) will be assumed.	String	Brochu 2003	tc:accordingTo
Specimen	@type	Required. Our terminology for specimens comes from the Darwin Core standard (Wieczorek et al., 2012).	IRI	Must be http://rs.tdwg.org/dwc/terms/Occurrence	rdf:type
Specimen	@id	An identifier for this specimen.	IRI	https://www.wikidata.org/wiki/Q1514294	N/A
Specimen	basisOfRecord	The type of specimen indicated.	String	PreservedSpecimen	dwc:basisOfRecord
Specimen	institutionCode	The name (or acronym) in use by the institution having custody of the object(s) or information referred to in the record.	String	FMNH	dwc:institutionCode
Specimen	collectionCode	The name, acronym, code, or initialism identifying the collection or data set from which the record was derived.	String	PR	dwc:collectionCode
Specimen	catalogNumber	An identifier for the record within the data set or collection.	String	2081	dwc:catalogNumber
Specimen	occurrenceID	An identifier for the Occurrence (as opposed to a particular digital record of the occurrence). In the absence of a persistent GUID, constructed from a unique combination of identifiers in the record, usually the Darwin Core Triplets (Darwin Core RDF guide, 2016) of institutionCode, collectionCode and catalogNumber.	String	FMNH:PR:2081	dwc:occurrenceID
Specimen	hasName	Can be used to record the taxon name that this specimen has been identified to.	Taxon Name	See example of a Taxon Name in the Taxon or taxon concept section above.	tc:hasName
Phylogeny	@id	The identifier for this phylogeny.	IRI	#phylogeny0	N/A
Phylogeny	label	A label describing this phylogeny.	String	Fig 1 from Brochu 2003	rdfs:label
Phylogeny	newick	Required. The Newick string.	String	(Parasuchia,(rauisuchians,Aetosauria,(sphenosuchians,(protosuchians,(mesosuchians,(Hylaeochampsa,Aegyptosuchus,Stomatosuchus,(Allodaposuchus,('Gavialis gangeticus',(('Diplocynodon ratelii',('Alligator mississippiensis','Caiman crocodilus')Alligatoridae)Alligatoroidea,('Tomistoma schlegelii',('Osteolaemus tetraspis','Crocodylus niloticus')Crocodylinae)Crocodylidae)Brevirostres)Crocodylia))Eusuchia…	phyloref:newick_expression
Phylogeny	source	The source of this phylogeny.	Citation	See above for an example Citation.	dct:source
Phylogeny	additionalNodeProperties	A dictionary mapping node labels to properties that should be added to the node when converting this Phyx file into an OWL ontology.	Object	"additionalNodeProperties": { "Exodictyon incrassatum": { "representsTaxonomicUnits": [{ "@type": "http://rs.tdwg.org/dwc/terms/Occurrence", "institutionCode": "UC", "catalogNumber": "Wall 2527, Fiji" ]} } }	N/A
Phyloreference	@id	The identifier for this phyloreference.	IRI	#Alligatoroidea	N/A
Phyloreference	label	A name for the clade defined by the phyloreference. For clade definitions digitized from the PhyloCode, the name will follow PhyloCode naming conventions (de Queiroz & Cantino, 2020).	String	Alligatoroidea	rdfs:label
Phyloreference	phylorefType	The type of this phyloreference.	Enumeration	One of phyloref:PhyloreferenceUsingMaximumClade, phyloref:PhyloreferenceUsingMinimumClade or phyloref:PhyloreferenceUsingApomorphy	N/A (copied over into '@type')
Phyloreference	scientificNameAuthorship	The authors who created this clade definition.	Citation	See the Citations section above for an example citation.	dwc:scientificNameAuthorship
Phyloreference	namePublishedIn	If the label is a scientific name, then this field records the publication in which that name was first published.	Citation	See the Citations section above for an example citation.	dwc:namePublishedIn
Phyloreference	definitionSource	The publication in which this clade definition was first published.	Citation	See example citation above.	obo:IAO_0000119
Phyloreference	definition	Required. A free-text field for storing the verbatim clade definition.	String	Alligator mississippiensis and all crocodylians closer to it than to Crocodylus niloticus or Gavialis gangeticus.	obo:IAO_0000115
Phyloreference	internalSpecifiers	A list of internal specifiers (defined as taxonomic units) that must be included in the clade.	Array of taxonomic units	See taxonomic unit examples above.	N/A
Phyloreference	externalSpecifiers	A list of external specifiers (defined as taxonomic units) that must be excluded from the clade.	Array of taxonomic units	See taxonomic unit examples above.	N/A
Phyloreference	apomorphy	If used, indicates that this phyloreference designates the clade that arises from the first appearance of this trait that is synapomorphic with an internal specifier. In this case, exactly one internal specifier and no external specifiers must be provided. The trait is described with the following fields:	Object		phyloref:apomorphy
Phyloreference	- @type	Required. Used to indicate the type of this trait.	IRI	Must be https://semanticscience.org/resource/SIO_010056 (“phenotype”)	rdf:type
Phyloreference	- bearingEntity	An IRI that identifies the entity bearing the phenotypic quality if the phenotype referenced by this apomorphy can be decomposed into a quality and the entity bearing the quality (EQ model).	IRI	http://purl.obolibrary.org/obo/UBERON_0008271	N/A
Phyloreference	- phenotypicQuality	An opaque IRI that identifies the phenotypic quality if the phenotype referenced by this apomorphy can be decomposed into entity and quality (EQ model). See bearingEntity.	IRI	Defaults to http://purl.obolibrary.org/obo/PATO_0000467 if one is not provided.	N/A
Phyloreference	- definition	Required. A definition of the apomorphy.	String	A complete turtle shell as inherited by Testudo graeca	obo:IAO_0000115
Phyloreference	expectedResolution	A dictionary of phylogeny identifiers to objects that record the nodeLabel (the node label on that phylogeny this phylogeny is expected to resolve to) as well as an optional description (describing why that node was chosen).	Dictionary	"expectedResolution": { "#phylogeny0": { "nodeLabel": "Gavialis gangeticus", “description”: “Only representative of Gavialoidea in this phylogeny.” } }	N/A
